# Supplementary material for: Phosphonate substituted 4,4′-bis(N-carbazolyl)biphenyl with dominant electron injection/transport ability for tuning the single-layer device performance of self-host phosphorescent dendrimer
Source: Royal Society of Chemistry journal article supplement (doi:10.1039/c2jm35526d), 2012-01-01
Supplement: c2jm35526d.pdf [file c2jm35526d.pdf]

## Supporting Information

# Phosphonate Substituted 4,4'-Bis(*N*-carbazolyl)biphenyl with Dominant Electron Injection/Transport Ability for Tuning the Single-Layer Device Performance of Self-Host Phosphorescent Dendrimer

Bo Chen,<sup>a,b</sup> Junqiao Ding,<sup>\*a</sup> Lixiang Wang,<sup>\*a</sup> Xiabin Jing<sup>a</sup> and Fosong Wang<sup>a</sup>

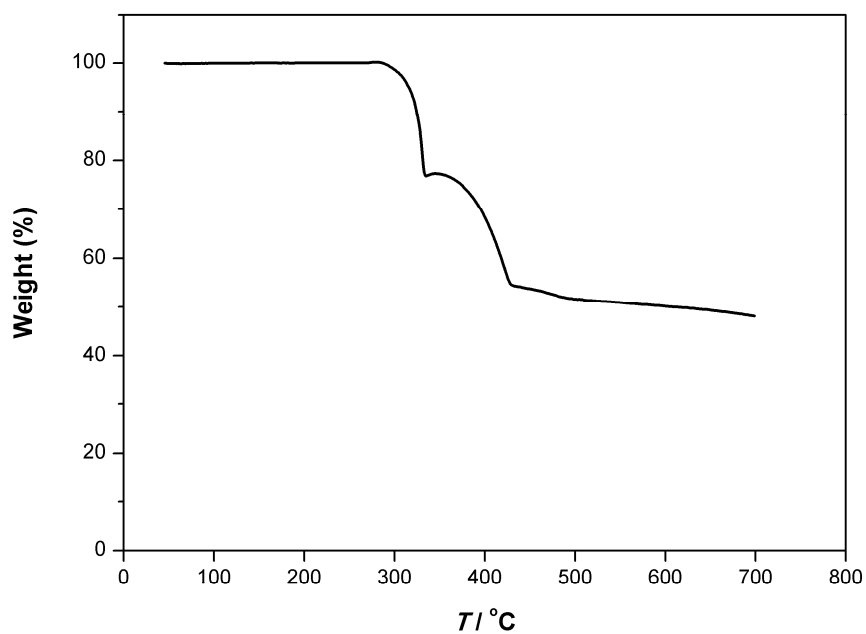

**Fig. S1** TGA spectrum for PCBP, at a heating rate of 10 °C/min under nitrogen atmosphere.

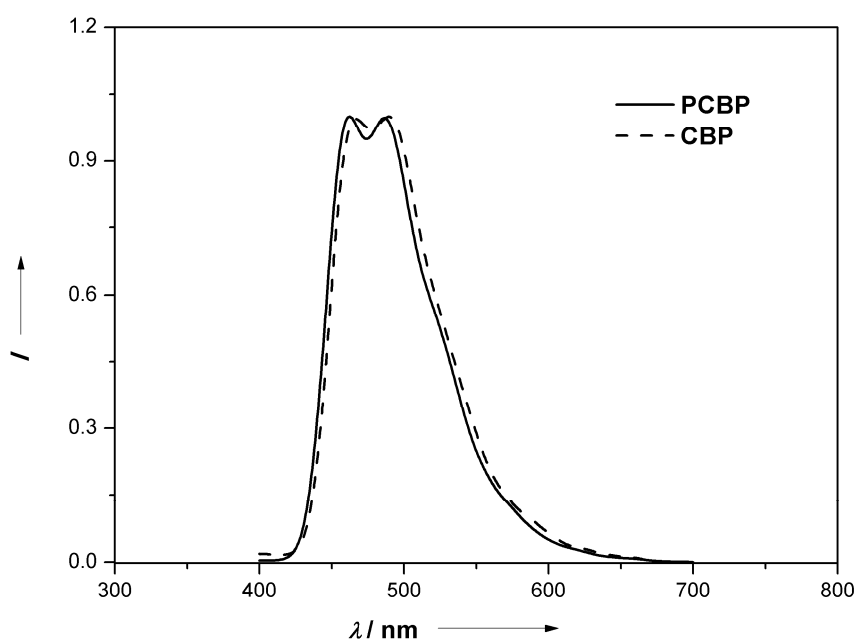

**Fig. S2** Normalized phosphorescence spectra of PCBP and CBP in  $10^{-3}$  M toluene solution at 77K.

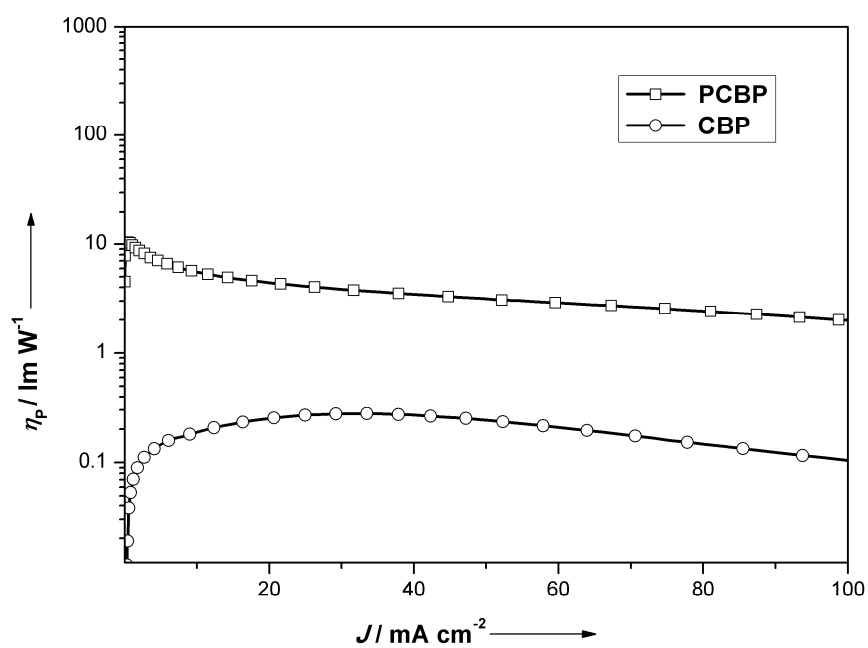

**Fig. S3** The power efficiency-current density characteristics of the devices.

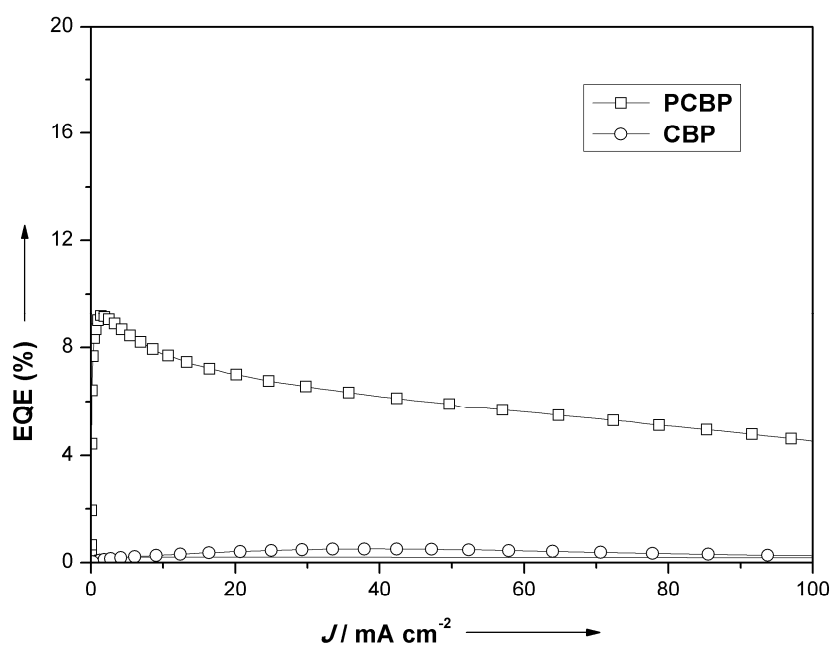

**Fig. S4** The EQE-current density characteristics of the devices.

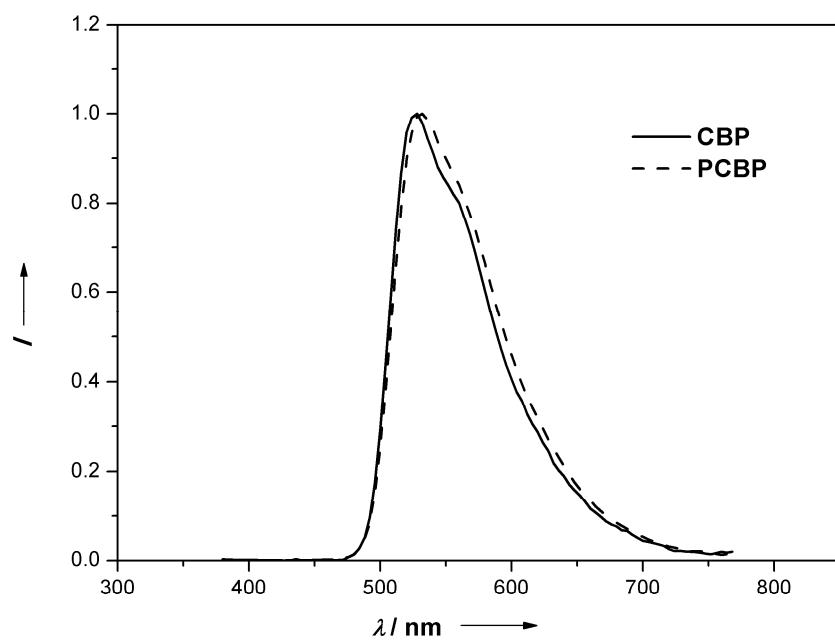

**Fig. S5** Normalized EL spectra of the devices at a driving voltage of 15 V.

**Table S1.** Crystallographic Parameters and Refinement Results for PCBP.

| Compound                                | PCBP                                                                                                                             |
|-----------------------------------------|----------------------------------------------------------------------------------------------------------------------------------|
| Empirical formula                       | $C_{52}H_{60}N_2O_{12}P_4 \cdot 2CH_2Cl_2$                                                                                       |
| Formula weight                          | 1198.75                                                                                                                          |
| Temperature                             | 185(2) K                                                                                                                         |
| Wavelength                              | 0.71073 Å                                                                                                                        |
| Crystal system                          | Monoclinic                                                                                                                       |
| Space group                             | $P2_1/c$                                                                                                                         |
| Unit cell dimensions                    | $a = 13.204(2)$ Å, $\alpha = 90^\circ$<br>$b = 10.4398(15)$ Å $\beta = 99.421(2)^\circ$<br>$c = 21.992(3)$ Å $\gamma = 90^\circ$ |
| Volume, Z                               | $2990.6(8)$ Å <sup>3</sup> , 2                                                                                                   |
| Theta range for data collection         | 1.56 to $26.07^\circ$                                                                                                            |
| Limiting indices                        | $-11 \leq h \leq 16$ , $-12 \leq k \leq 12$ ,<br>$-27 \leq l \leq 27$                                                            |
| Density (calculated)                    | 1.331 Mg/m <sup>3</sup>                                                                                                          |
| Absorption coefficient                  | 0.364 mm <sup>-1</sup>                                                                                                           |
| F(000)                                  | 1252                                                                                                                             |
| Crystal size (mm <sup>3</sup> )         | $0.42 \times 0.35 \times 0.10$                                                                                                   |
| Reflections collected                   | 18740                                                                                                                            |
| Independent reflections                 | 5887 [ $R(\text{int}) = 0.0317$ ]                                                                                                |
| Max. and min. transmission              | 0.9645 and 0.8622                                                                                                                |
| Data / restraints / parameters          | 5887/0/383                                                                                                                       |
| Goodness-of-fit on F <sup>2</sup>       | 1.008                                                                                                                            |
| Final R indices [ $I \geq 2\sigma(I)$ ] | $R1 = 0.0625$ , $wR2 = 0.1601$                                                                                                   |
| R indices (all data)                    | $R1 = 0.0851$ , $wR2 = 0.1772$                                                                                                   |
| Largest diff. peak and hole             | 0.800 and $-0.775$ e/Å <sup>-3</sup>                                                                                             |
